# Supplementary material
Source: MDPI journal article supplement (https://www.mdpi.com/2673-4583/5/1/8)
Supplement: s1 [file s1]

# TUNABLE ELECTROCHEMICAL SENSORS BASED ON CARBON NANOCOMPOSITE MATERIALS TOWARDS ENHANCED DETERMINATION OF CADMIUM, LEAD AND COPPER IN WATER

Laia. L. Fernández<sup>a,b</sup>; Julio Bastos<sup>c</sup>; Cristina Palet<sup>a</sup>; Mireia Baeza<sup>b\*</sup>

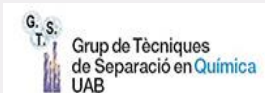

<sup>a</sup>Grup de Tècniques de Separació(GTS). Departament de Química. Universitat Autònoma de Barcelona. Carrer dels Til·lers, 08193, Bellaterra, Catalunya, Spain

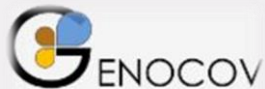

<sup>b</sup>Group of biological treatment and of liquid and gaseous Effluents, Nutrient removal, and Odors and Volatile Organic Compounds (GENOCOV). Departament Química. Universitat Autònoma de Barcelona. Carrer dels Til·lers, 08193, Bellaterra, Catalunya, Spain.

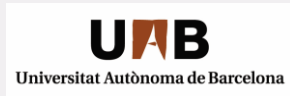

<sup>c</sup>Grup de Biotecnologia Molecular Industrial, Department d'Enginyeria Química, Universitat Politècnica de Catalunya, Rambla Sant Nebridi, 22, 08222 Terrassa, Catalunya, Spain

• \*[mariadelmar.baeza@uab.cat](mailto:mariadelmar.baeza@uab.cat)



# Index

## ✧ Introduction

- ✧ Composite Materials
- ✧ Electrode Construction
- ✧ Carbon Materials
- ✧ Electrochemical techniques

## ✧ Results

- ✧ Carbon Materials
- ✧ Mercury Nanoparticles

## ✧ Conclusions

# Introduction

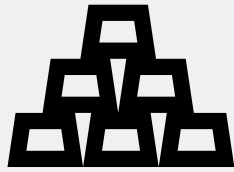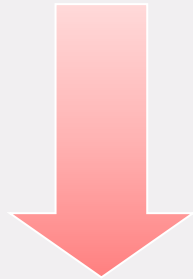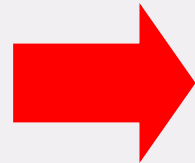

AAS  
ICP-AES  
ICP-MS  
Spectrophotometry  
HPLC

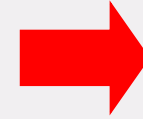

extensive sample preparation  
expensive equipment  
specialized technicians  
non-portable

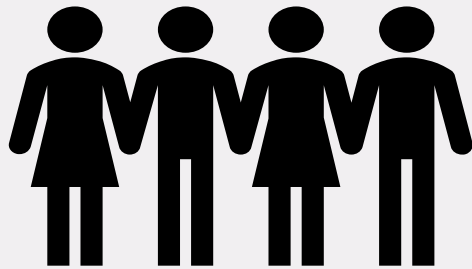

Electrochemical techniques

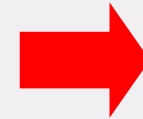

relatively short time of analysis  
low-cost equipment  
specialized personnel is not required  
portable

# Introduction: Composite Materials

**Composite material** = material 1 + material 2 + material n

Requirement: the materials must not react with each other.

The composite material is a new material with new physical, chemical and mechanical properties.

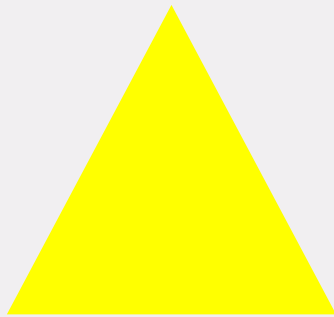

Material 1

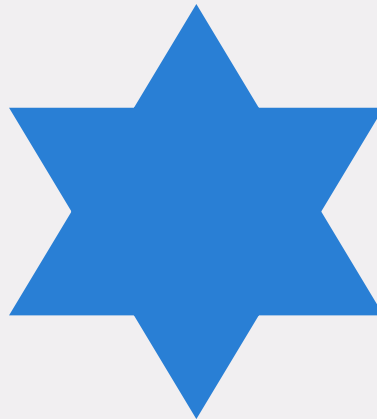

Composite Material

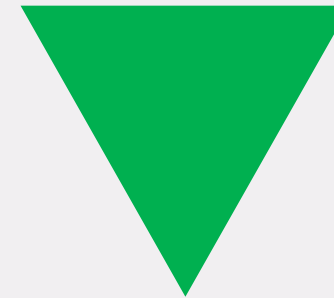

Material 2



# Introduction: Electrode Construction

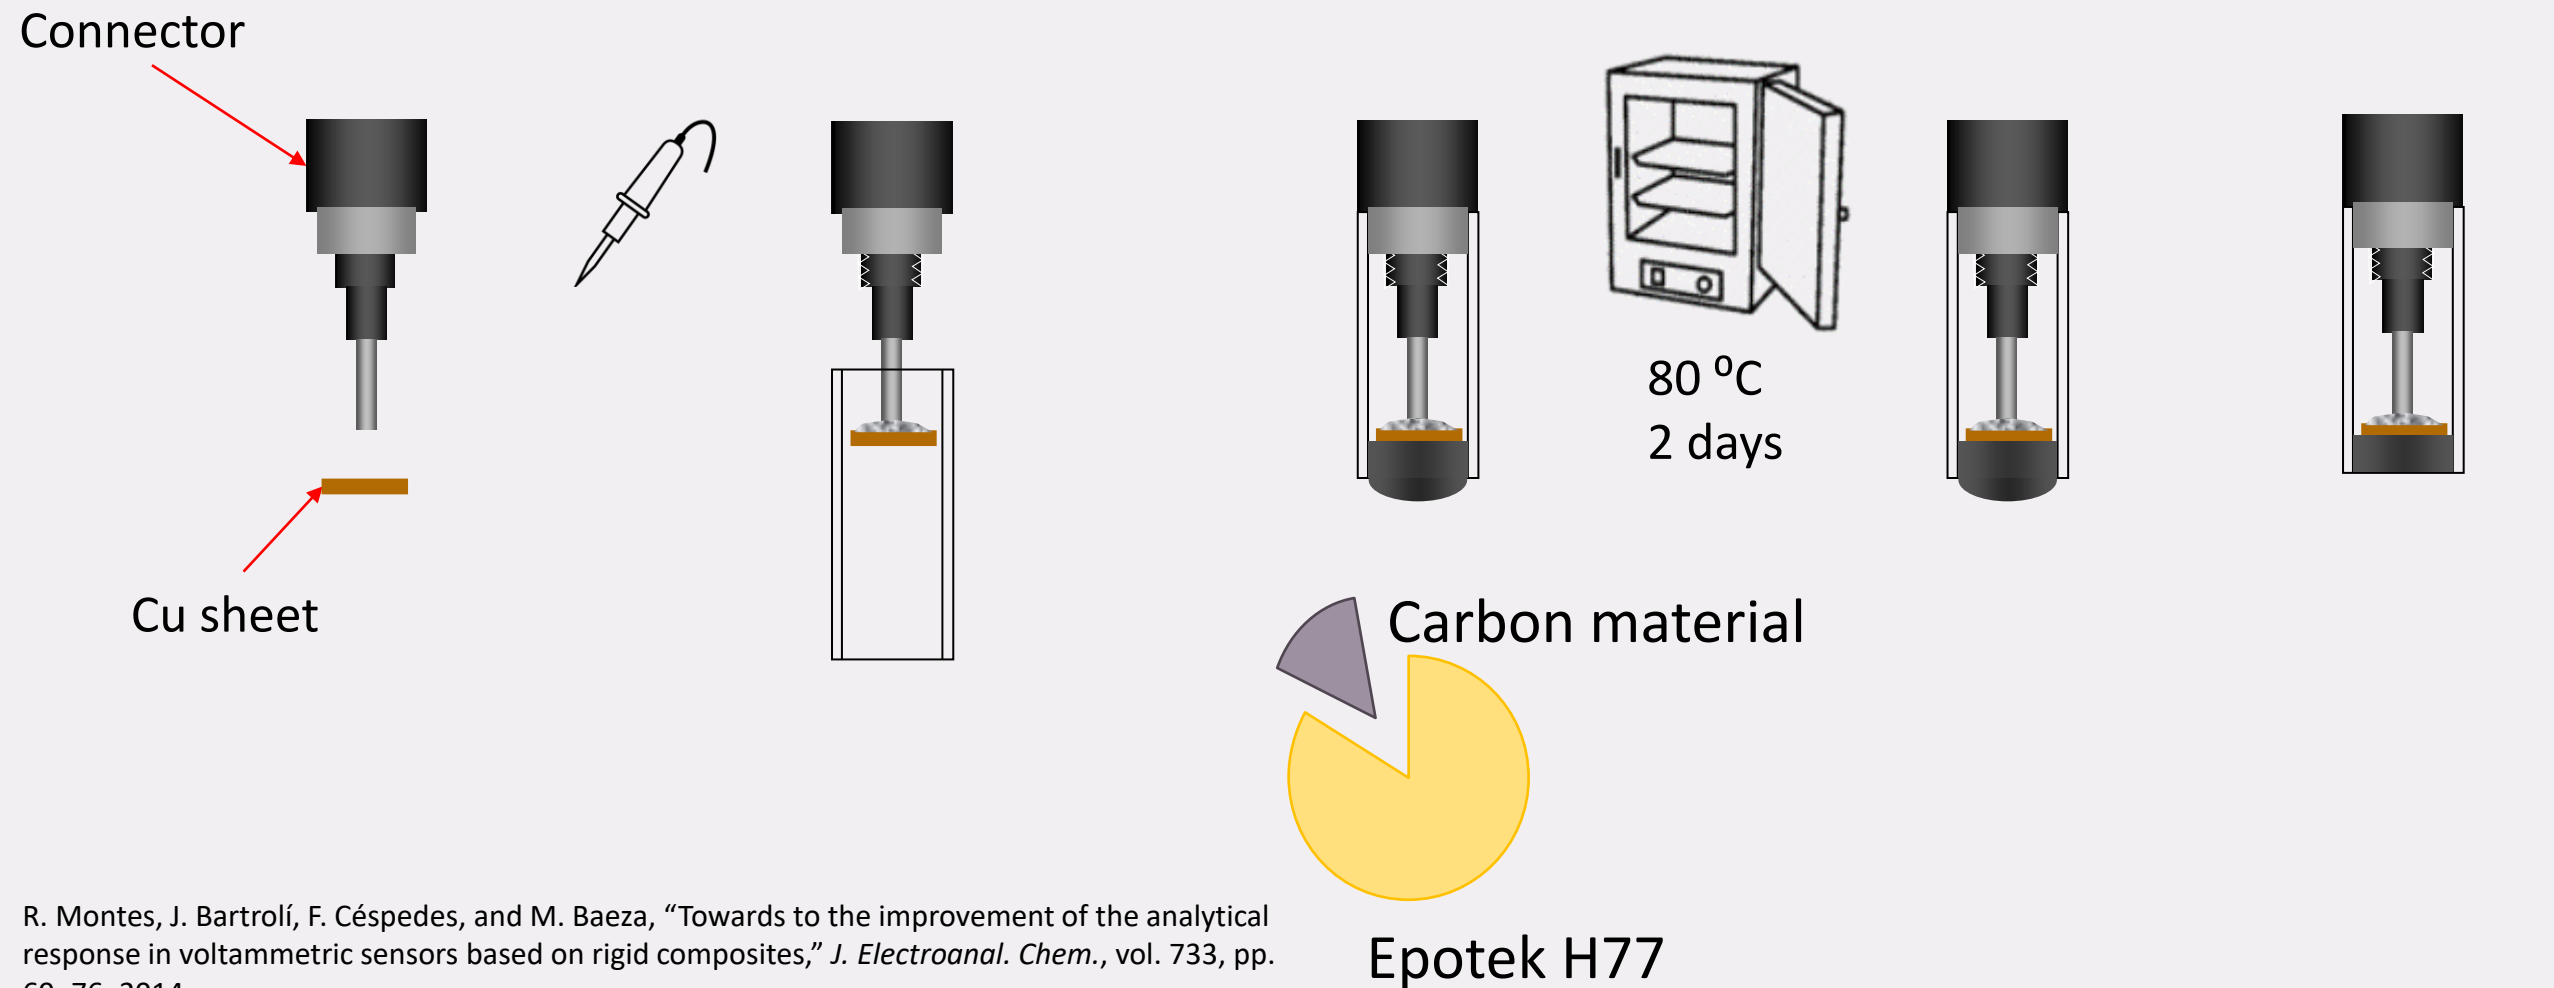

R. Montes, J. Bartrolí, F. Céspedes, and M. Baeza, "Towards to the improvement of the analytical response in voltammetric sensors based on rigid composites," *J. Electroanal. Chem.*, vol. 733, pp. 69–76, 2014.

# Introduction: Carbon Materials

## Carbon Materials

- ✓ Graphite
- X rGO
- ✓ MWCNTs

Graphite

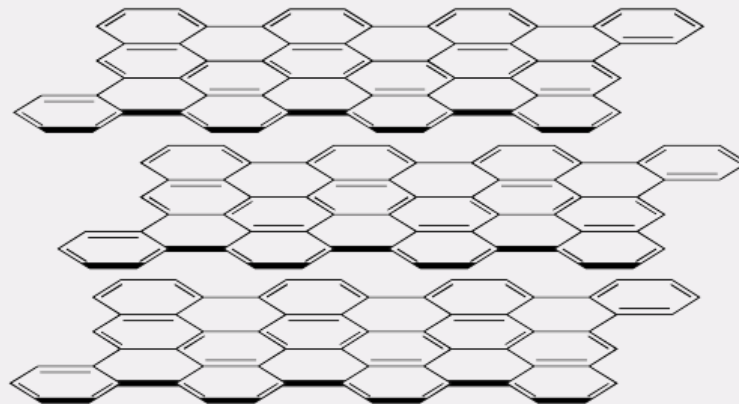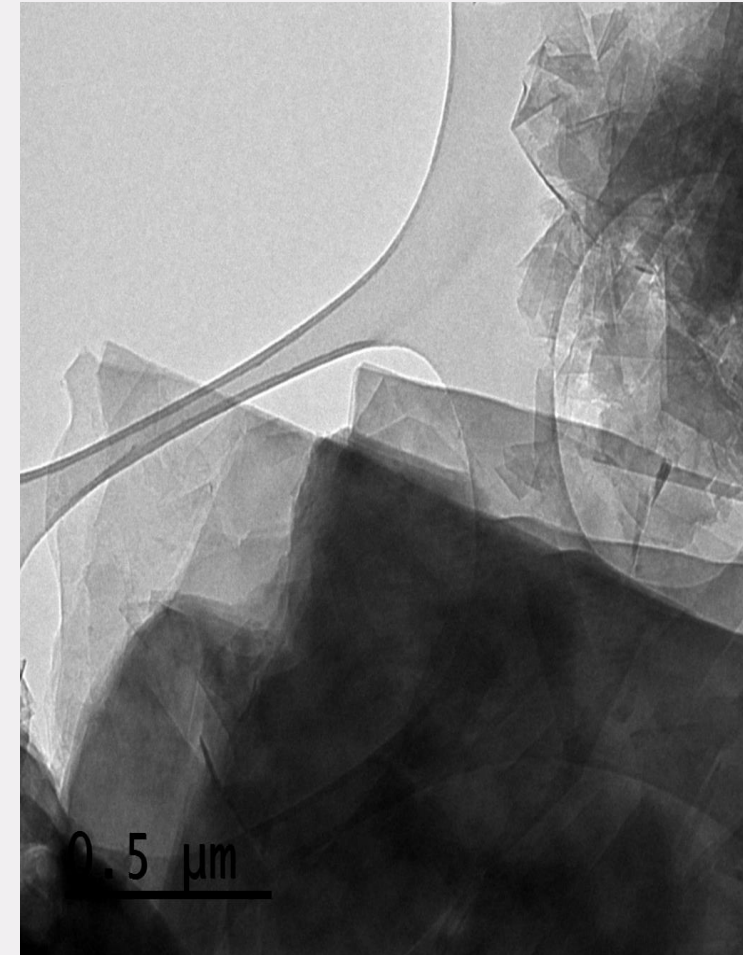



# Introduction: Carbon Materials

## Carbon Materials

- ✓ Graphite
- X rGO
- ✓ MWCNTs

rGO

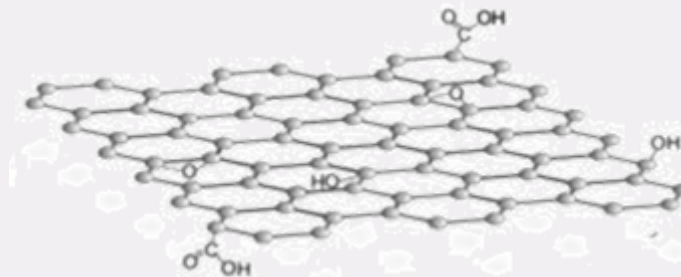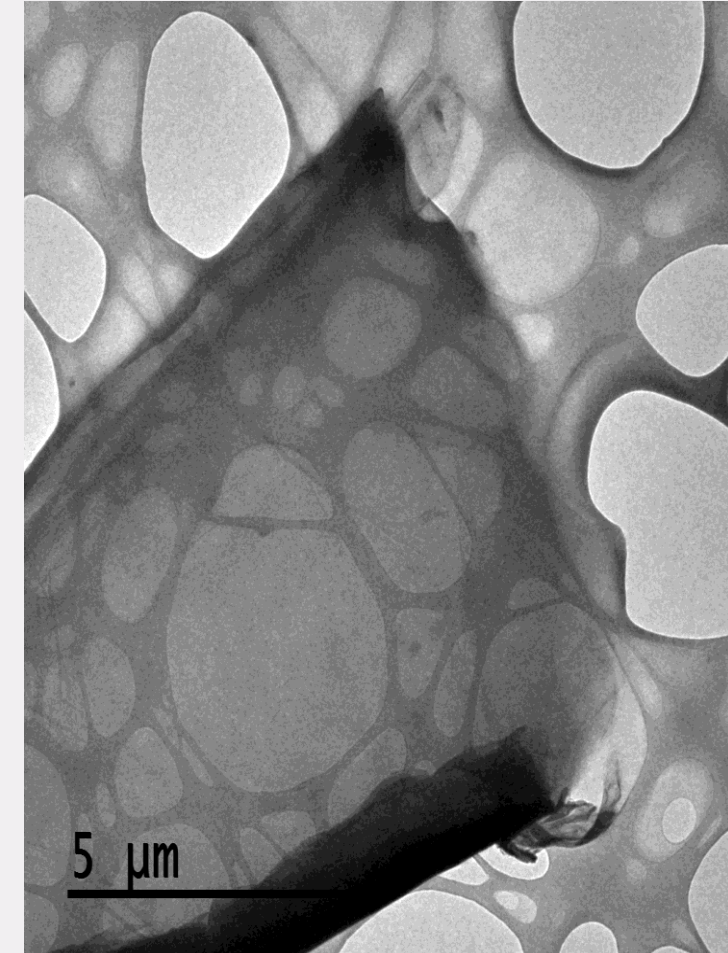



# Introduction: Carbon Materials

## Carbon Materials

- ✓ Graphite
- X rGO
- ✓ MWCNTs

MWCNTs

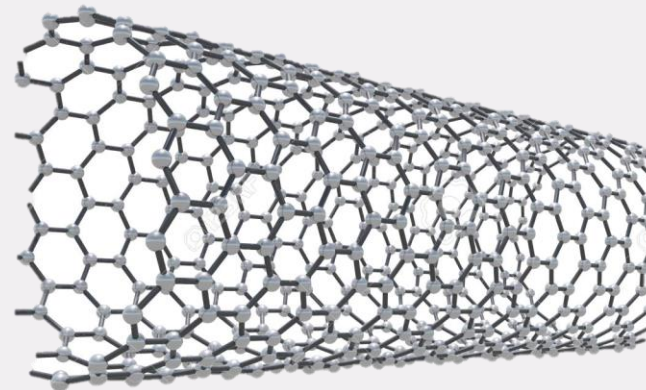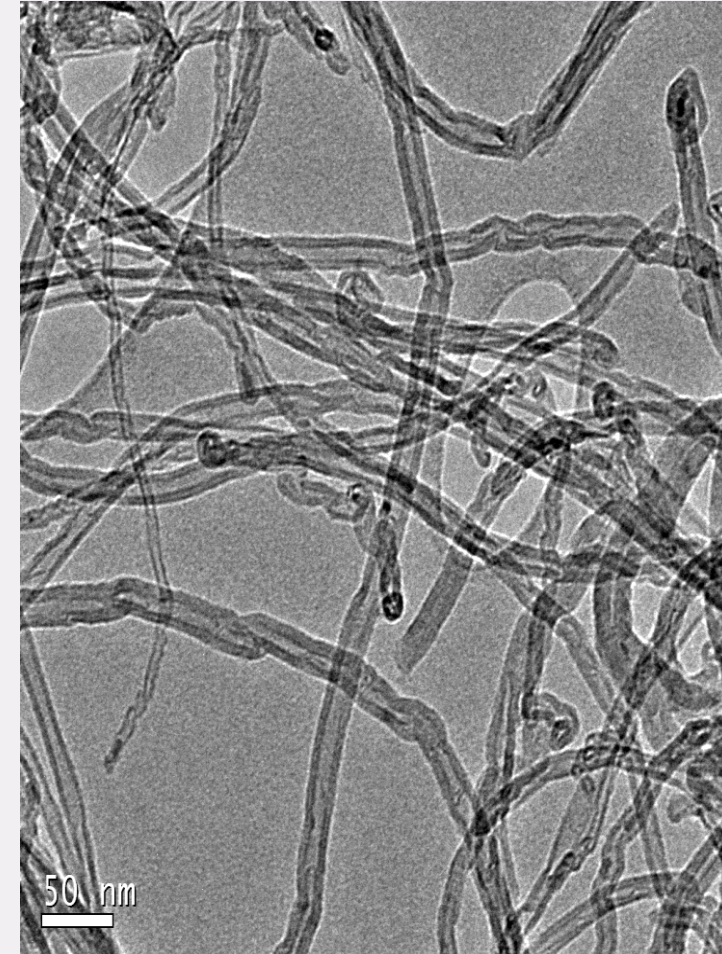



# Introduction: Carbon Materials

## Carbon Materials

- ✓ Graphite
- X rGO
- ✓ MWCNTs

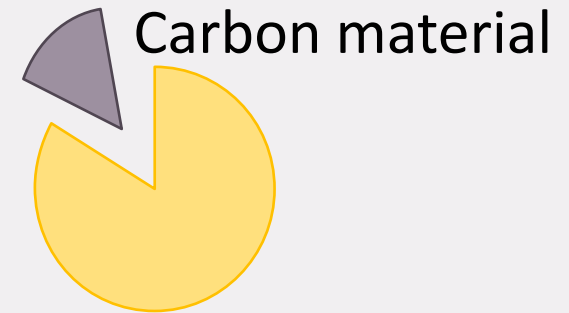

### Composites tested:

Epotek H77

|                       |             |
|-----------------------|-------------|
| Graphite (15 %, 20 %) | Epotek H-77 |
| rGO (15 %)            | Epotek H-77 |
| MWCNTs (10 %)         | Epotek H-77 |

# Introduction: Electrode Modification

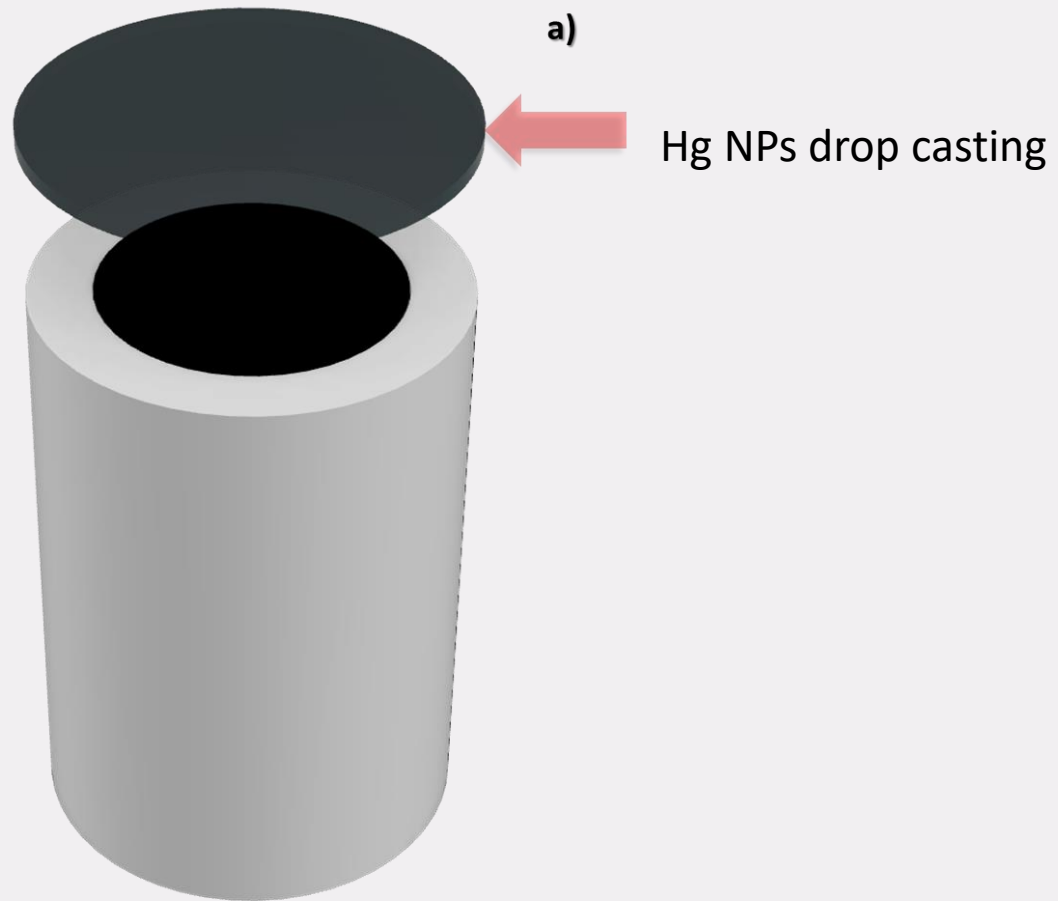



# Introduction: Electrochemical Techniques

## Characterization techniques

- Cyclic Voltammetry (CV)
- Electrochemical Impedance Spectroscopy (EIS)

## Measurement techniques

- Square-Wave Anodic Stripping Voltammetry (SWASV)

# Introduction: Cyclic Voltammetry (CV)

CV is the measurement of the current that flows through an electrode as a triangular variation of potential is applied. Peaks correspond to an electronic transfer between the electrode and a dissolved species.

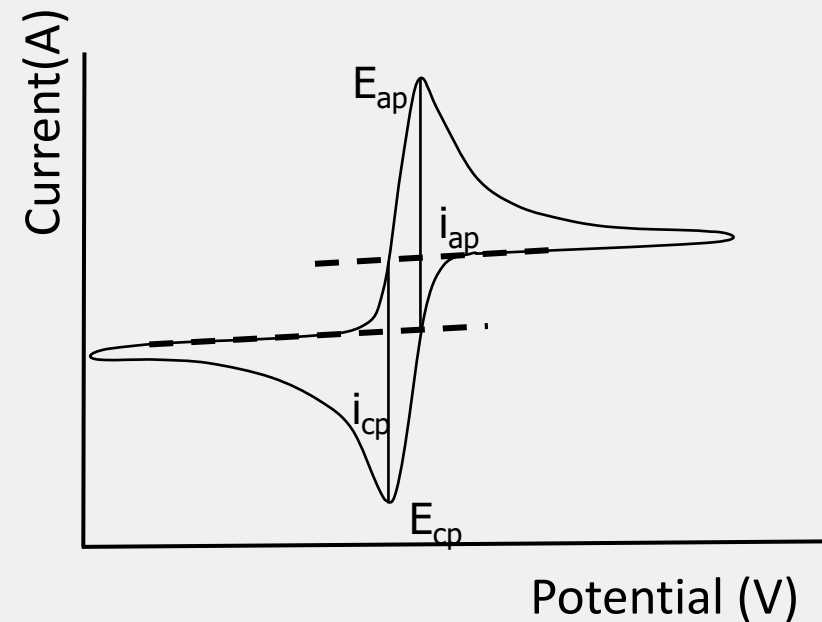



# Introduction: Electrochemical Impedance Spectroscopy (EIS)

EIS is a perturbative characterization of the dynamics of an electrochemical process. It is based on the application of an alternating current and measure the resistance of the current to go through the material.

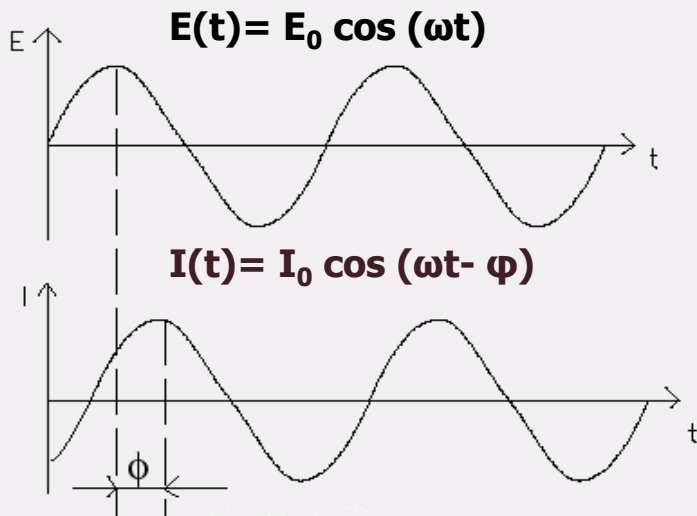

$$Z = \frac{E(t)}{I(t)}$$

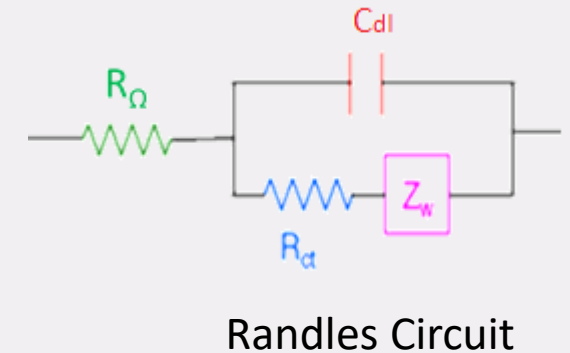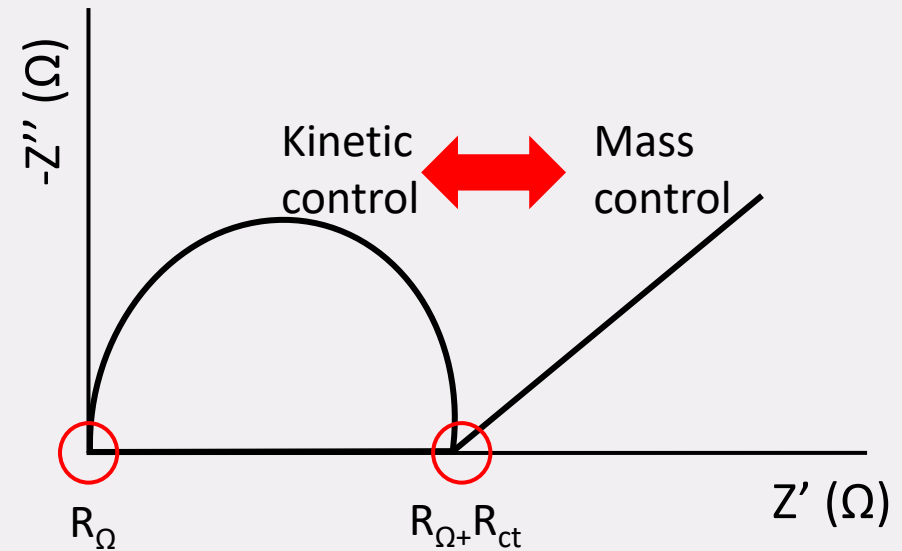

Nyquist plot

# Introduction: Square Wave-Anodic Stripping Voltammetry (SWASV)

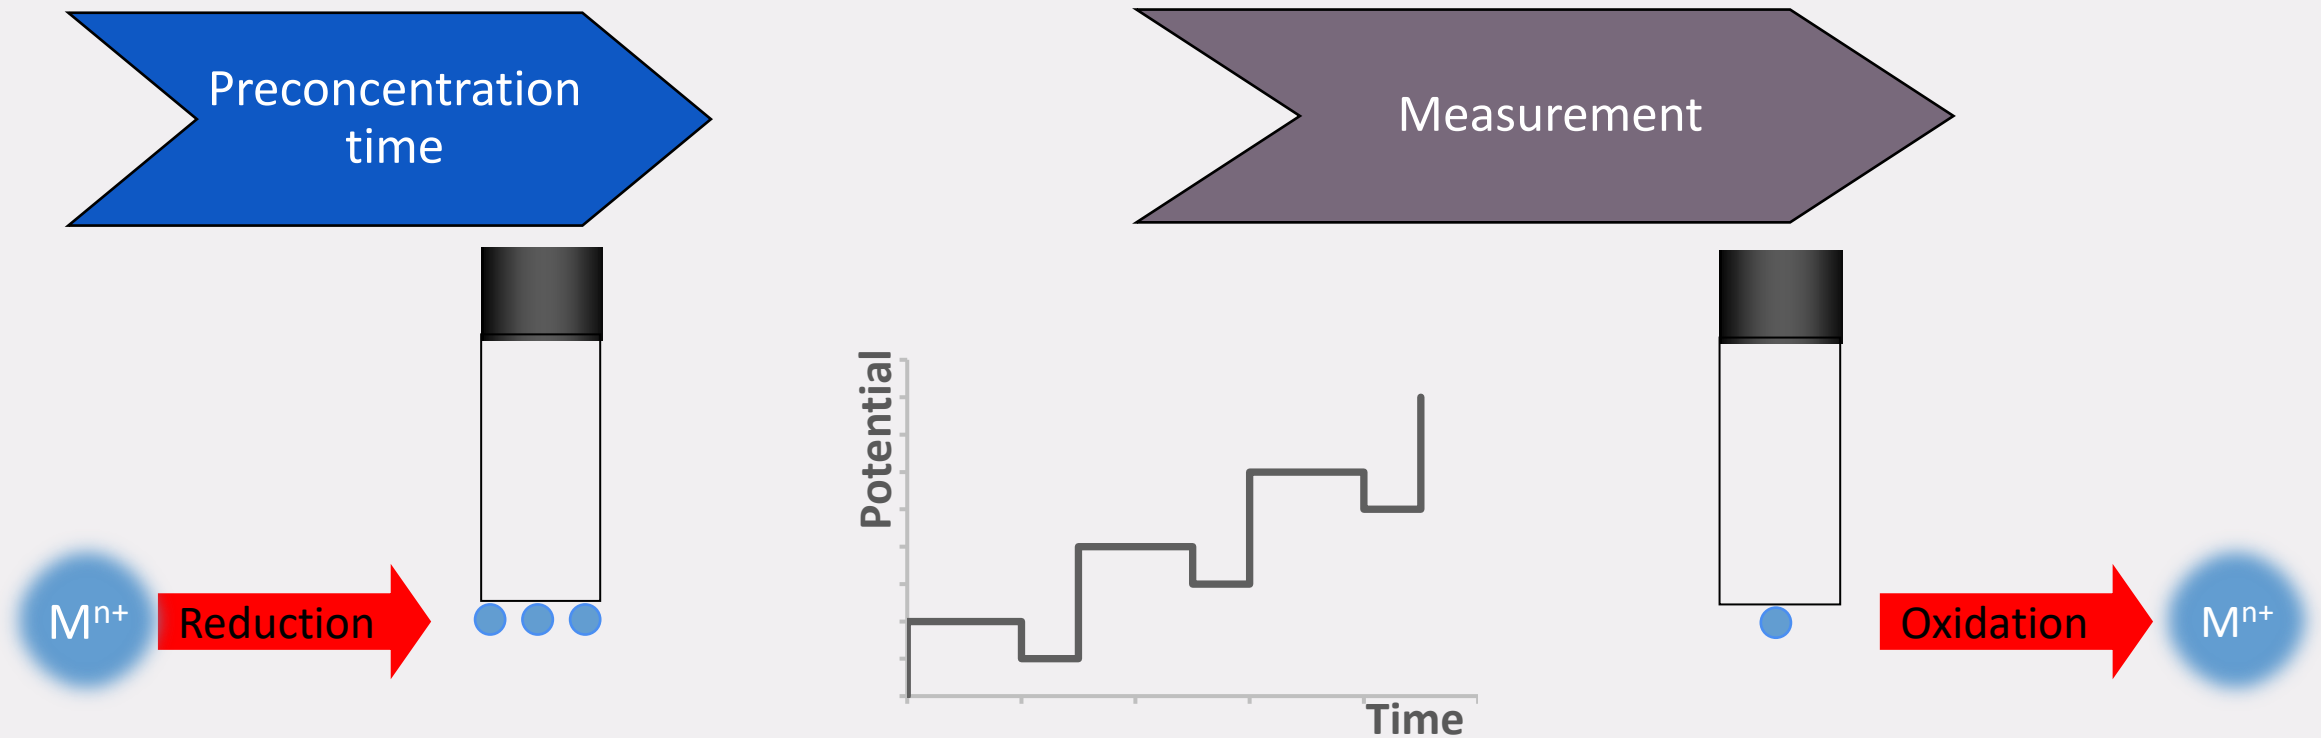



# Results: Carbon Material

Electrode characterization before using:

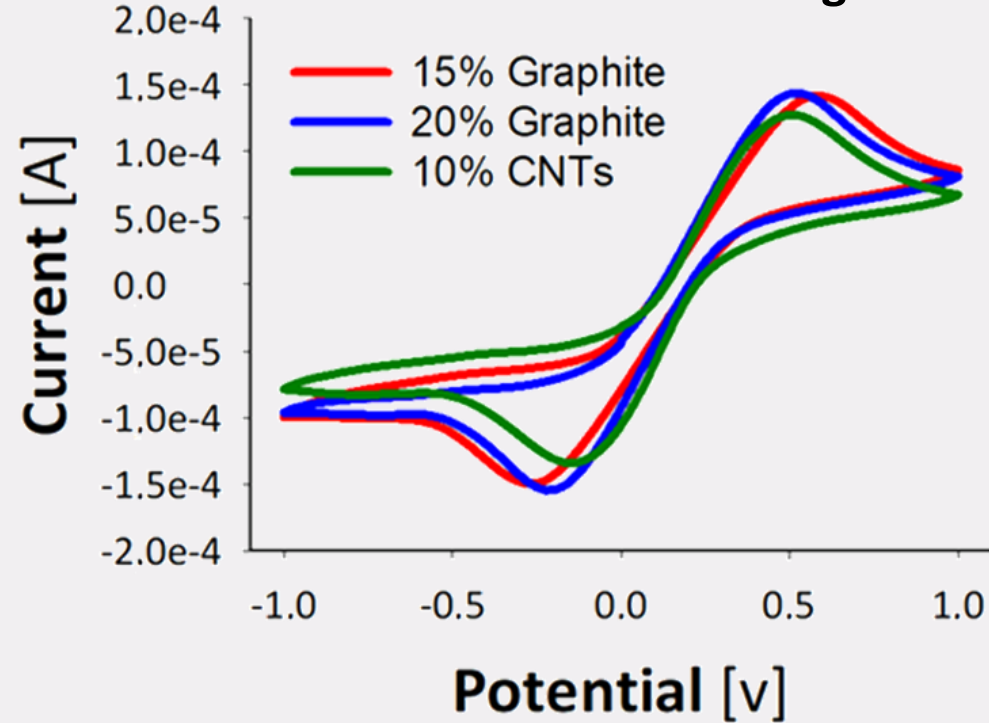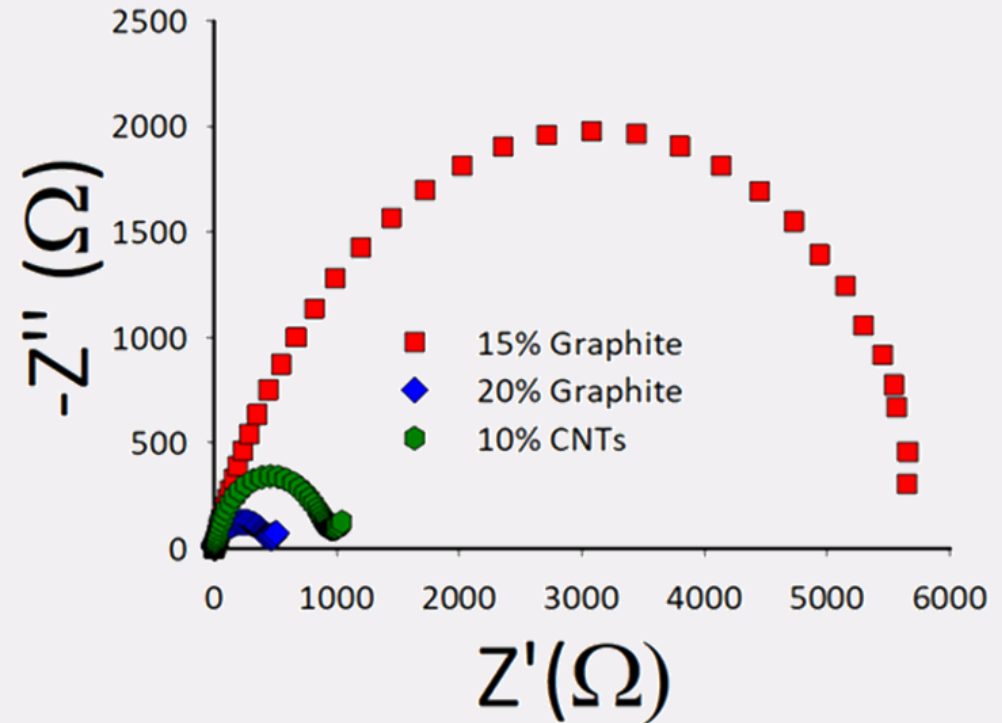

Experimental conditions:

$\text{Fe}(\text{CN}_6)^{4+}$  0.01M  
 $\text{Fe}(\text{CN}_6)^{3+}$  0.01M  
KCl 0.1M  
Scan rate: 10 mV/seg

WE: composite electrode  
RE: Ag/AgCl  
CE: Pt

# Results: Carbon Material

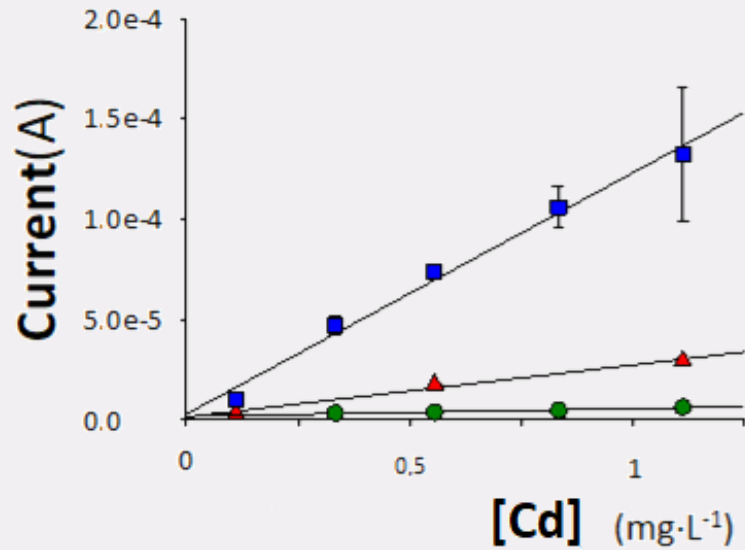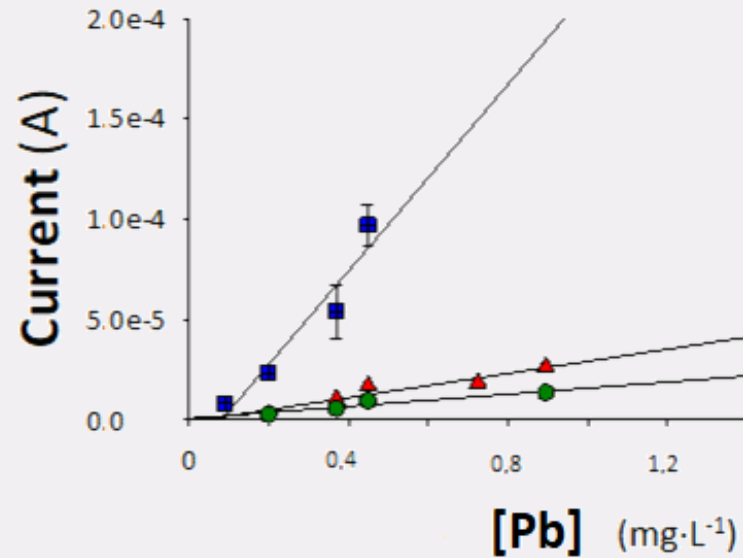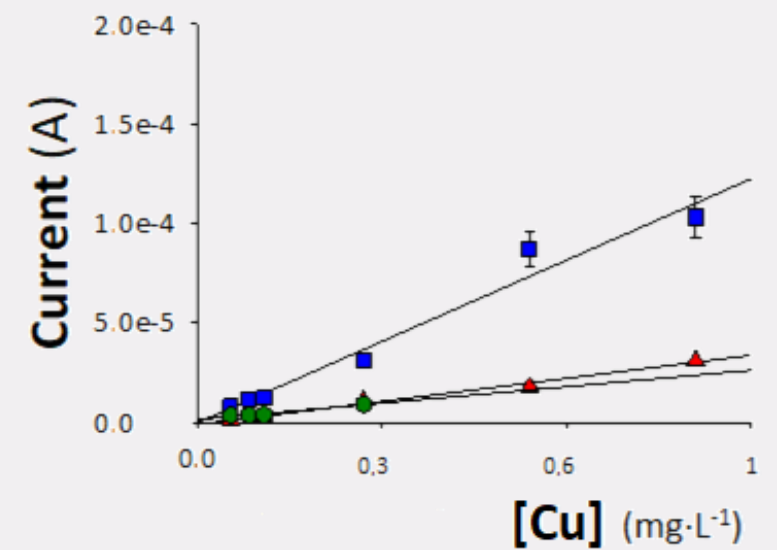

- ▲ 15% Graphite
- 20% Graphite
- 10% CNTs
- Regression

## Linear Range for 20% Graphite

- Cd<sup>2+</sup> → 0.1 – 1 mg·L<sup>-1</sup>
- Pb<sup>2+</sup> → 0.090 – 0.45 mg·L<sup>-1</sup>
- Cu<sup>2+</sup> → 0.057 – 1.14 mg·L<sup>-1</sup>



# Results: Mercury Nanoparticles

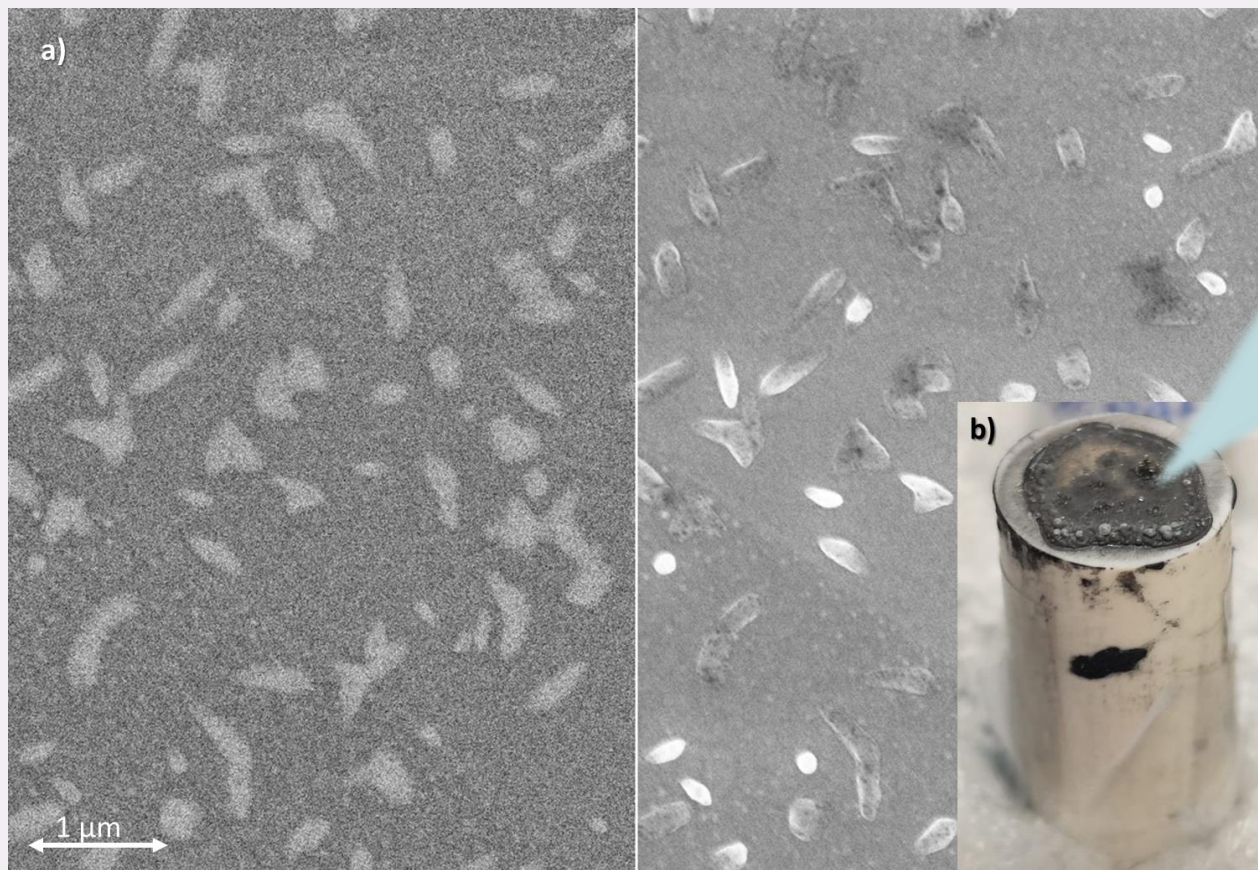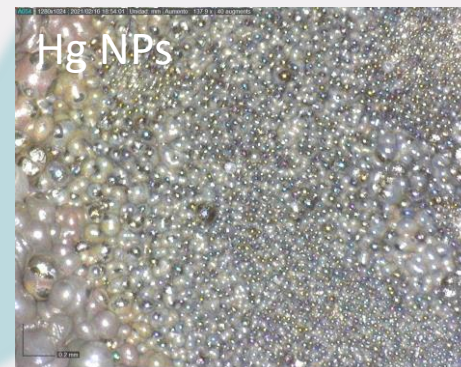

DinoLite images of the electrodes' surface

a) Retrodispersive (left) and secondary electron (right) SEM images. b) 20% graphite electrode drop casted with HgNPs image.

# Results: Mercury Nanoparticles

$\text{Cd}^{2+}$

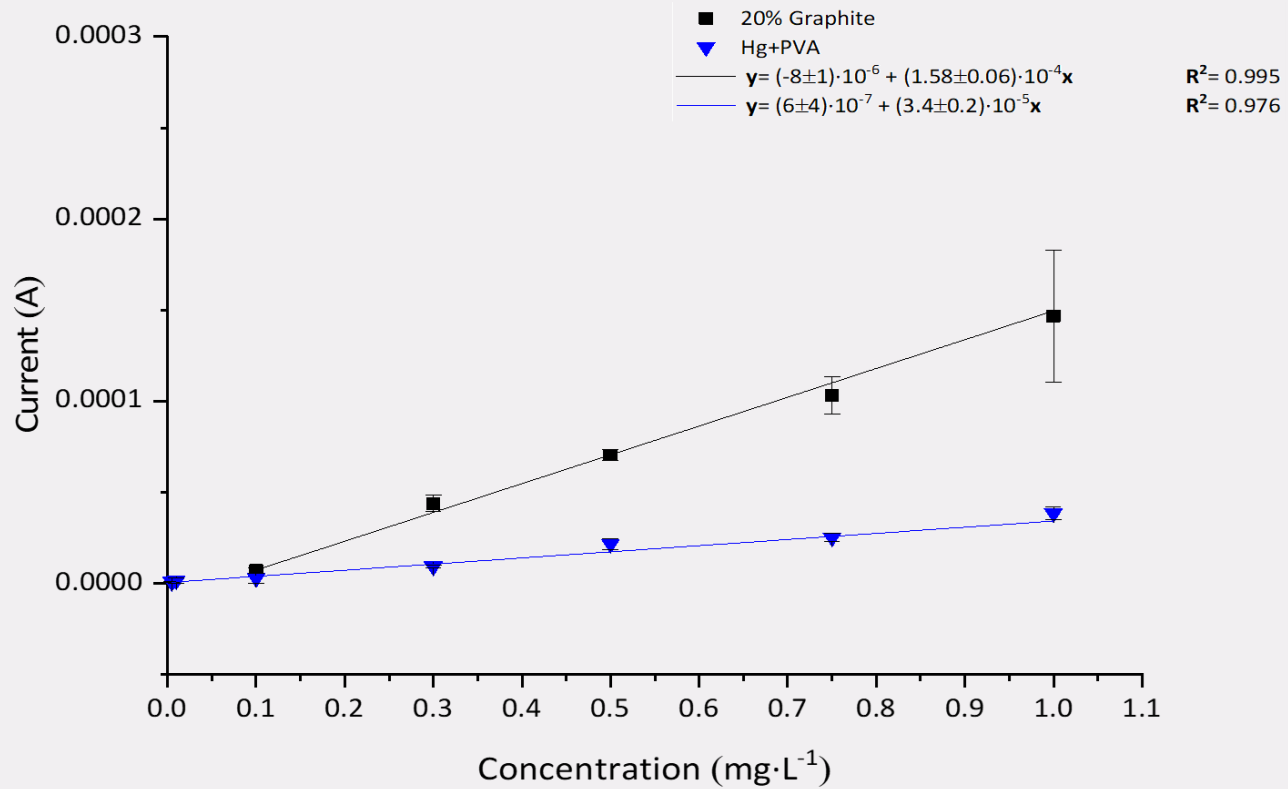

**Linear Range for 20% Graphite**

-  $\text{Cd}^{2+} \rightarrow 0.1 - 1 \text{ mg} \cdot \text{L}^{-1}$

**Linear Range for Hg NPs**

-  $\text{Cd}^{2+} \rightarrow 0.005 - 1 \text{ mg} \cdot \text{L}^{-1}$



# Results: Mercury Nanoparticles

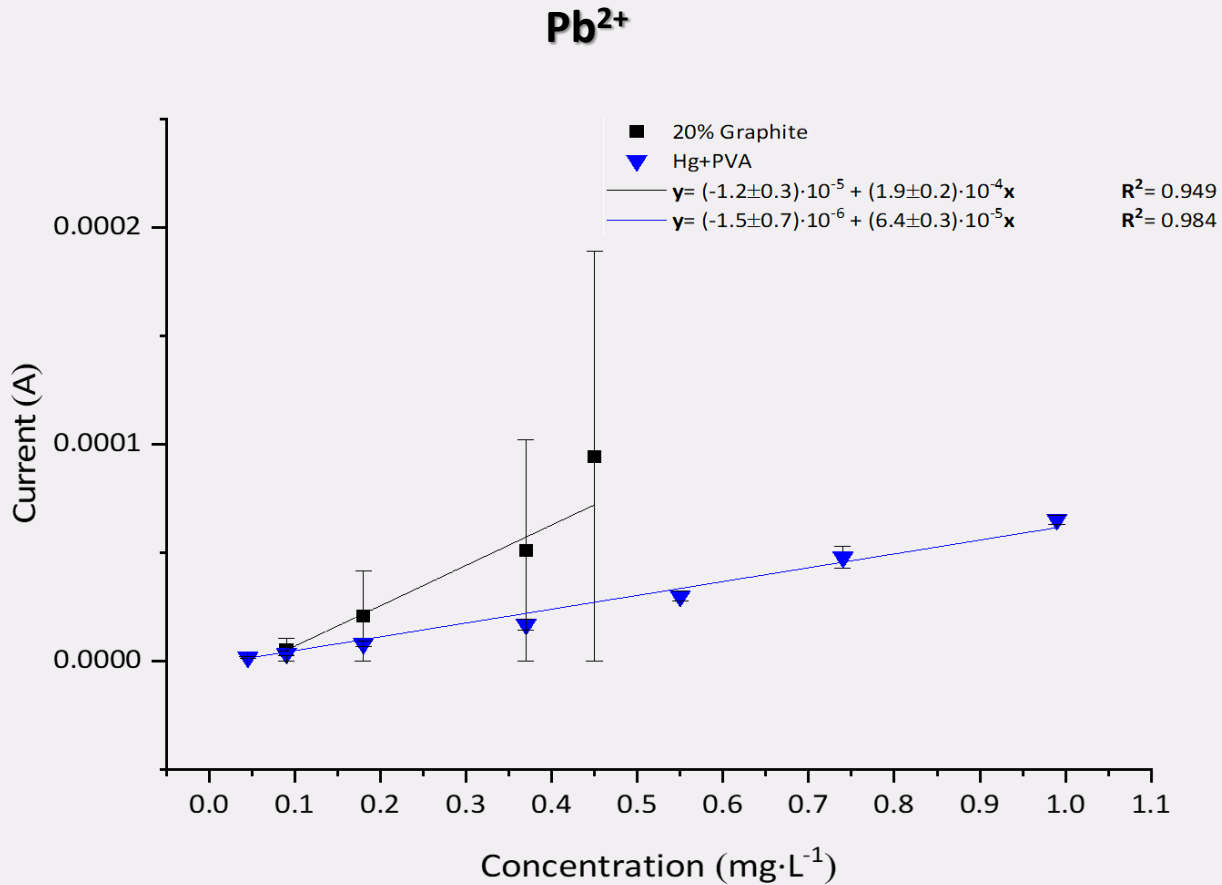

**Linear Range for 20% Graphite**

- Pb<sup>2+</sup> → 0.090 – 0.45 mg·L<sup>-1</sup>

**Linear Range for Hg NPs**

- Pb<sup>2+</sup> → 0.045-1 mg·L<sup>-1</sup>

# Results: Mercury Nanoparticles

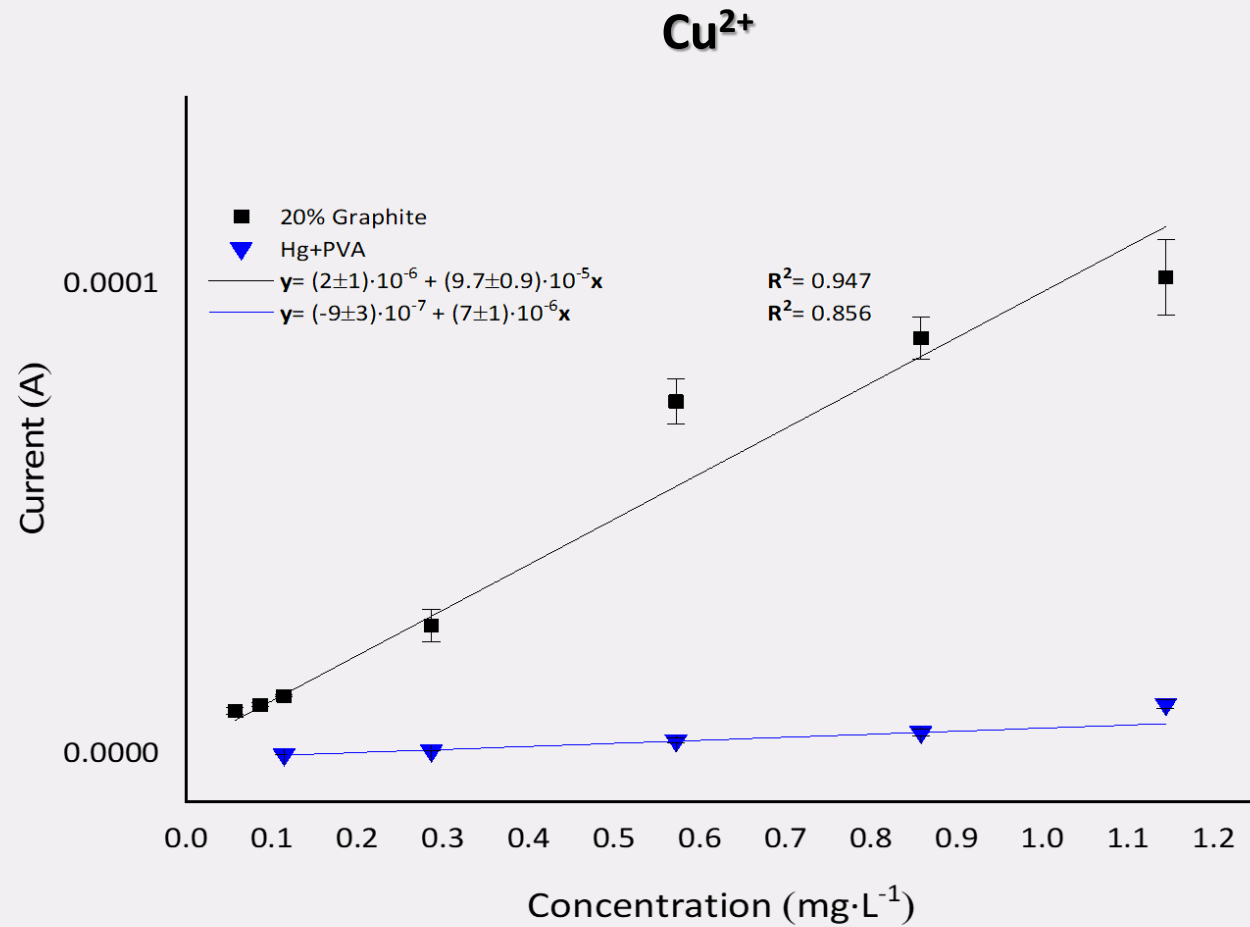

**Linear Range for 20% Graphite**  
- Cu<sup>2+</sup> → 0.057 – 1.14 mg·L<sup>-1</sup>

**Linear Range for Hg NPs**  
- Cu<sup>2+</sup> → 0.1-1.14 mg·L<sup>-1</sup>



# Conclusions

- ✗ The most suitable option of the non-modified electrode to determine  $\text{Cd}^{2+}$ ,  $\text{Pb}^{2+}$  and  $\text{Cu}^{2+}$  using SWASV is the composite electrode with 20% graphite.
- ✗ Hg nanoparticles are good option to modify composite electrodes to determine those metals.
  - ✗ Lower concentrations can be determined.
  - ✗ For  $\text{Cd}^{2+}$  and  $\text{Pb}^{2+}$  a wider linear range can be achieved



# TUNABLE ELECTROCHEMICAL SENSORS BASED ON CARBON NANOCOMPOSITE MATERIALS TOWARDS ENHANCED DETERMINATION OF CADMIUM, LEAD AND COPPER IN WATER

Laia. L. Fernández<sup>a,b</sup>; Julio Bastos<sup>c</sup>; Cristina Palet<sup>a</sup>; Mireia Baeza<sup>b\*</sup>



<sup>a</sup>Grup de Tècniques de Separació(GTS). Departament de Química. Universitat Autònoma de Barcelona. Carrer dels Til·lers, 08193, Bellaterra, Catalunya, Spain



<sup>b</sup>Group of biological treatment and of liquid and gaseous Effluents, Nutrient removal, and Odors and Volatile Organic Compounds (GENOCOV). Departament Química. Universitat Autònoma de Barcelona. Carrer dels Til·lers, 08193, Bellaterra, Catalunya, Spain.



<sup>c</sup>Grup de Biotecnologia Molecular Industrial, Department d'Enginyeria Química, Universitat Politècnica de Catalunya, Rambla Sant Nebridi, 22, 08222 Terrassa, Catalunya, Spain

• \*[mariadelmar.baeza@uab.cat](mailto:mariadelmar.baeza@uab.cat)
